# Supplementary material
Source: publisher figshare collection journal article supplement (https://acs.figshare.com/ndownloader/files/5092411)
Supplement: Supplementary file 1 [file 5092411]

# Hydrocarbon and Carbon Nanostructures Produced by Sonochemical Reactions of Organic Solvents on Hydrogen-Passivated Silicon Nanowires under Ambient Conditions

*C.P. Li,<sup>1,2</sup> Boon K. Teo,<sup>3\*</sup> X.H. Sun,<sup>1,4 †</sup> N.B. Wong,<sup>1,4</sup> S.T. Lee,<sup>1,2\*</sup>*

<sup>1</sup>Center of Super-Diamond & Advanced Film, <sup>2</sup>Department of Physics and Materials Science, <sup>4</sup>Department of Biology and Chemistry, City University of Hong Kong, Hong Kong SAR, China.

<sup>3</sup>Department of Chemistry, University of Illinois at Chicago, 845 W. Taylor Street, Chicago, IL, 60607.

**RECEIVED DATE (to be automatically inserted after your manuscript is accepted if required according to the journal that you are submitting your paper to)**

To whom correspondence should be addressed. Email: boonkteo@uic.edu (for Boon K. Teo), apannale@cityu.edu.hk (for S.T. Lee)

<sup>†</sup> Present address: Department of Chemistry, University of Western Ontario, London, Canada

## Supporting materials

Fig. S1 is a low-magnification TEM image of an assortment of carbon nano loops. The HRTEM images of some of the loop-like structures are depicted in Fig. 5. Some other connected hydrocarbon nanostructures were observed also observed. Fig. S2 shows a HCNO, with a core diameter of about 1.7 nm and eight shells, grown as a “knot” attached to the body of a HCNT with eight layers and an interlayer spacing of 4 Å. Similar but less regular shaped onions can be found embedded in the “trunk” of the HCNT. A connected network of HCNT/HCNO is shown in Fig. S3(a) and an embroidery-like pattern is depicted in Fig. S3(b). Many other morphologies or nanostructures were also observed.

**Figure S1.** A low-magnification TEM image of some carbon nano loops.

**Figure S2.** A HRTEM image of a HCNO, with a core diameter of about 1.7 nm and eight shells, grown as a “knot” attached to the body of a HCNT with eight layers and an interlayer spacing of 4 Å.

**Figure S3.** (a) A HRTEM image of a connected network of HCNT/HCNO. (b) A HRTEM image of a belt of connecting HCNT/HCNO.

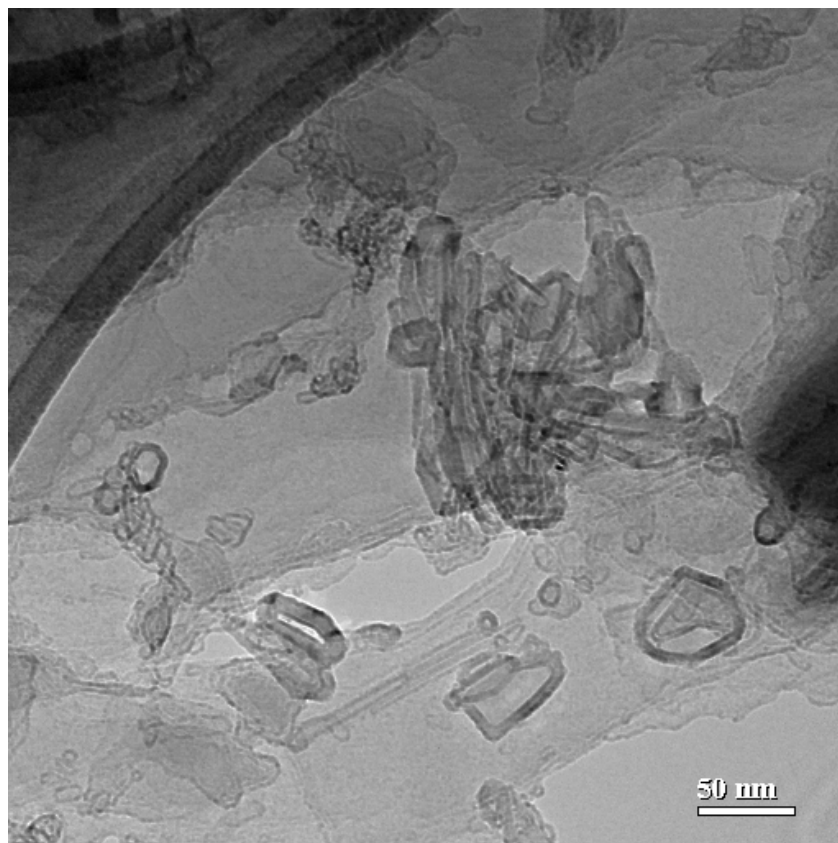

Fig. S1

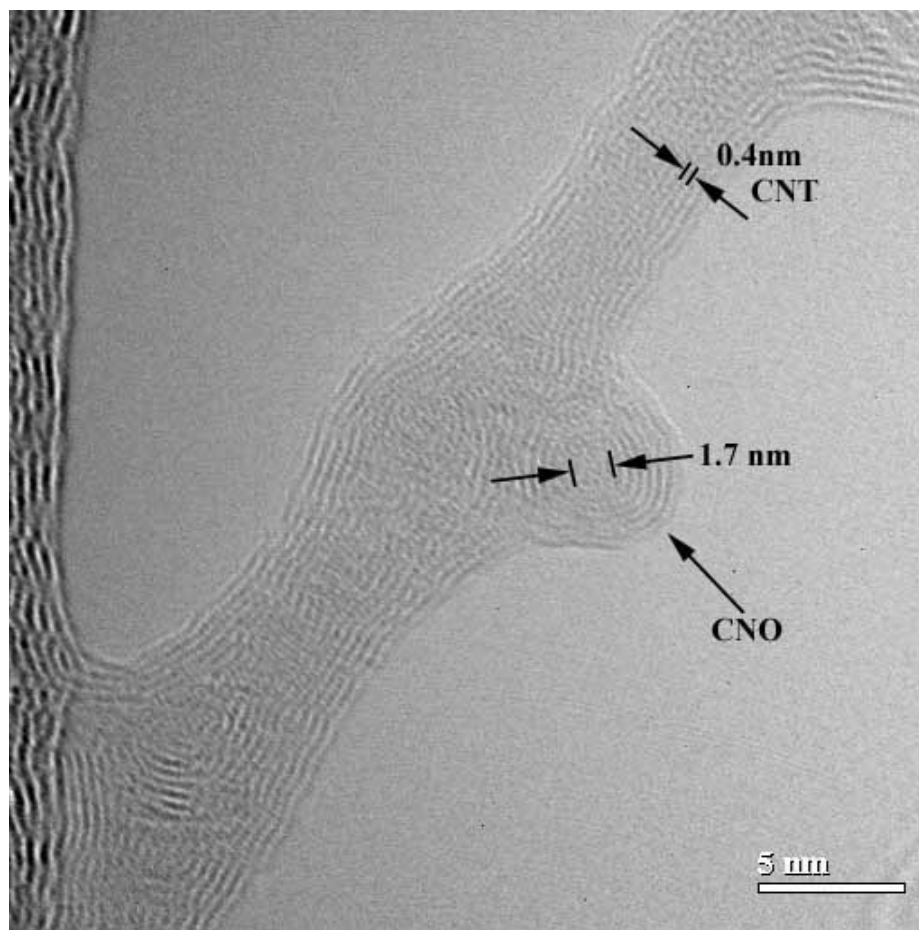

Fig. S2

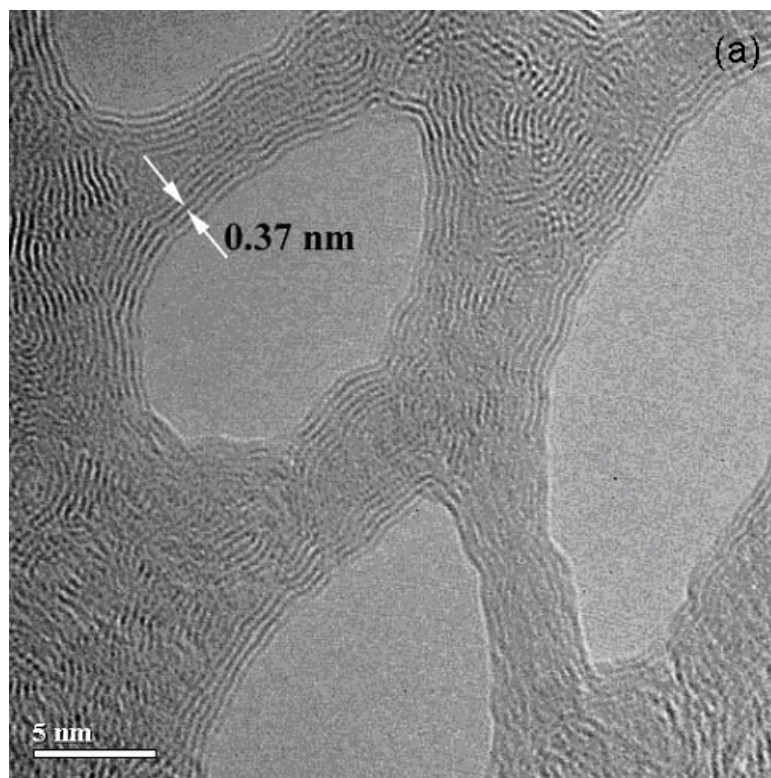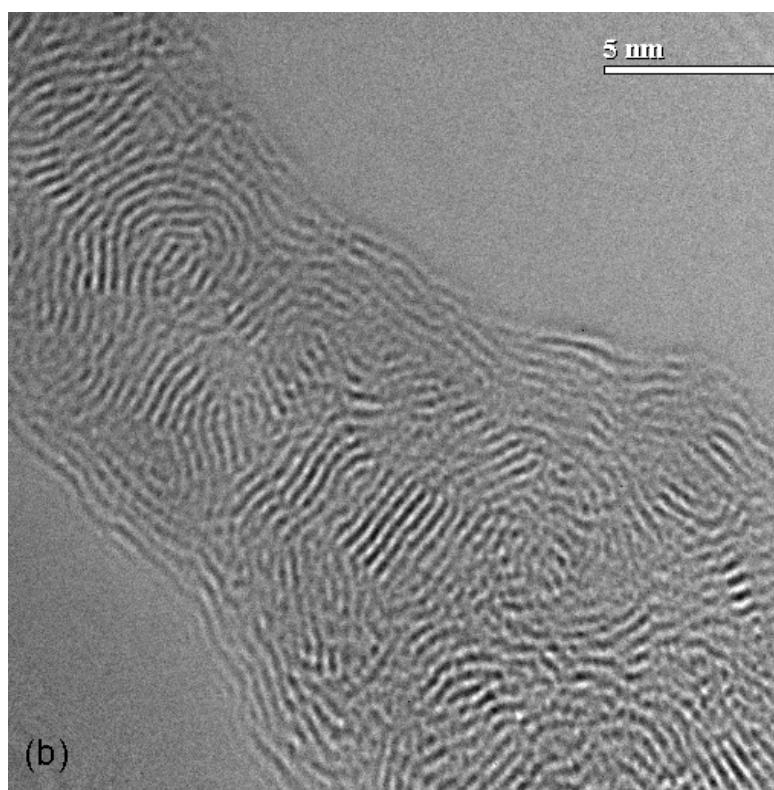

Fig. S3
